# Supplementary material for: Intraciliary calcium oscillations initiate vertebrate left-right asymmetry
Source: PubMed Central journal article supplement (PMC4469357; doi:10.1016/j.cub.2014.12.051), 2015-02-05
Supplement: NIHMS661880-supplement-1.pdf [file NIHMS661880-supplement-1.pdf]

| Intraciliary calcium initiates left-right asymmetry<br>S. Yuan, L. Zhao, M. Brueckner and Z. Sun                                          |       |
|-------------------------------------------------------------------------------------------------------------------------------------------|-------|
| Inventory of Supplemental Information                                                                                                     | Page  |
| Figure S1: Pharmacological manipulation of intra-ciliary calcium                                                                          | 2-3   |
| Figure S2: Ratiometric imaging of ICOs and cytosolic calcium waves in the LRO                                                             | 4-6   |
| Figure S3: ICOs are suppressed in <i>pkd2</i> mutants                                                                                     | 7-9   |
| Figure S4: ICOs precede cytosolic calcium waves during LRO development                                                                    | 10-11 |
| Figure S5: Suppression of intraciliary calcium by <i>arl13b-Pvalb</i> and equimolar expression relative to <i>HA-Pvalb</i>                | 12-14 |
| Figure S6: Intraciliary calcium is upstream of mesendodermal calcium, LRO size and cilia motility are not affected by <i>Arl13b-Pvalb</i> | 15-17 |
| Movie S1: ICOs are biased to the left-side of the LRO                                                                                     | 18    |
| Movie S2: <i>pkd2</i> morphants exhibit a loss of ICOs at the LRO                                                                         | 18-19 |
| Movie S3: <i>c21orf59</i> morphants exhibit a loss of ICOs at the LRO                                                                     | 19    |
| Movie S4: <i>arl13b-Pvalb</i> mRNA expressing embryos exhibit dampening of ICOs at the LRO                                                | 20    |
| Movie S5: Left-sided mesendodermal calcium in control embryo                                                                              | 20    |
| Movie S6: Loss of asymmetrical mesendodermal calcium in <i>arl13b-Pvalb</i> and <i>Pkd2</i> morphant embryos                              | 21    |
| Methods: Animal care ethics                                                                                                               | 22    |
| Methods: Zebrafish husbandry and microinjection and Morpholinos                                                                           | 22    |
| Methods: Cloning of GECs, PVALB and mRNA transcription                                                                                    | 23    |
| Methods: Cell culture, transfection and live imaging                                                                                      | 23-24 |
| Methods: Calcium imaging and pharmacological manipulations                                                                                | 24-25 |
| Methods: Zebrafish cardiac laterality analysis                                                                                            | 25-26 |
| Methods: Generation of chimeric DFC embryos                                                                                               | 26    |
| Methods: In situ hybridization                                                                                                            | 27    |
| Methods: In-vivo imaging of intraciliary calcium oscillations in the zebrafish LRO                                                        | 27-30 |
| Methods: Longitudinal analysis of intraciliary calcium oscillations and cardiac laterality in <i>pkd2</i> mutant zebrafish                | 30-31 |
| Methods: Spatial analysis of motile and immotile cilia                                                                                    | 31-32 |
| Methods: Suppression of intraciliary calcium in zebrafish LRO                                                                             | 32-33 |
| Methods: Mesendodermal calcium imaging and cilia motility in the zebrafish LRO                                                            | 33-34 |
| Methods: <i>Arl13b</i> cilia length measurements in the LRO                                                                               | 34-35 |
| Methods: Preparation of embryo lysates and western blots                                                                                  | 35    |
| Methods: Statistics                                                                                                                       | 36    |
| Supplementary References                                                                                                                  | 37-38 |
